# Supplementary material
Source: publisher site journal article supplement (https://www.dovepress.com/article/286421)
Supplement: Supplementary file 1 [file 286421-Revised-Supplementary-Figure.pdf › 286421-Revised-Supplementary-Figure.pdf]

A

Mutation Taster

Prediction

disease causing

Model: *simple\_aae*, prob: 0.9999999999999999 (explain)

Summary

- amino acid sequence changed
- protein features (might be) affected
- splice site changes

[hyperlink](#)

| analysed issue                                       | analysis result                                                                                                                                                                                                      |        |           |           |            |       |   |  |       |   |            |       |   |
|------------------------------------------------------|----------------------------------------------------------------------------------------------------------------------------------------------------------------------------------------------------------------------|--------|-----------|-----------|------------|-------|---|--|-------|---|------------|-------|---|
| name of alteration                                   | no title                                                                                                                                                                                                             |        |           |           |            |       |   |  |       |   |            |       |   |
| alteration (phys. location)                          | chr5:149435680C>G <a href="#">show variant in all transcripts</a> <a href="#">IGV</a>                                                                                                                                |        |           |           |            |       |   |  |       |   |            |       |   |
| HGNC symbol                                          | <a href="#">CSF1R</a>                                                                                                                                                                                                |        |           |           |            |       |   |  |       |   |            |       |   |
| Ensembl transcript ID                                | <a href="#">ENST00000286301</a>                                                                                                                                                                                      |        |           |           |            |       |   |  |       |   |            |       |   |
| Genbank transcript ID                                | <a href="#">NM_005211</a>                                                                                                                                                                                            |        |           |           |            |       |   |  |       |   |            |       |   |
| UniProt peptide                                      | <a href="#">P07333</a>                                                                                                                                                                                               |        |           |           |            |       |   |  |       |   |            |       |   |
| alteration type                                      | single base exchange                                                                                                                                                                                                 |        |           |           |            |       |   |  |       |   |            |       |   |
| alteration region                                    | CDS                                                                                                                                                                                                                  |        |           |           |            |       |   |  |       |   |            |       |   |
| DNA changes                                          | c.2463G>C<br>cDNA.2755G>C<br>g.57256G>C                                                                                                                                                                              |        |           |           |            |       |   |  |       |   |            |       |   |
| AA changes                                           | W821C Score: 215 <a href="#">explain score(s)</a>                                                                                                                                                                    |        |           |           |            |       |   |  |       |   |            |       |   |
| position(s) of altered AA<br>if AA alteration in CDS | 821                                                                                                                                                                                                                  |        |           |           |            |       |   |  |       |   |            |       |   |
| frameshift                                           | no                                                                                                                                                                                                                   |        |           |           |            |       |   |  |       |   |            |       |   |
| known variant                                        | Variant was neither found in ExAC nor 1000G.<br><a href="#">Search ExAC</a>                                                                                                                                          |        |           |           |            |       |   |  |       |   |            |       |   |
| regulatory features                                  | H3K36me3, Histone, Histone 3 Lysine 36 Tri-Methylation                                                                                                                                                               |        |           |           |            |       |   |  |       |   |            |       |   |
| phyloP / phastCons                                   | <table><tr><td></td><td>PhyloP</td><td>PhastCons</td></tr><tr><td>(flanking)</td><td>4.737</td><td>1</td></tr><tr><td></td><td>5.734</td><td>1</td></tr><tr><td>(flanking)</td><td>5.734</td><td>1</td></tr></table> |        | PhyloP    | PhastCons | (flanking) | 4.737 | 1 |  | 5.734 | 1 | (flanking) | 5.734 | 1 |
|                                                      |                                                                                                                                                                                                                      | PhyloP | PhastCons |           |            |       |   |  |       |   |            |       |   |
|                                                      | (flanking)                                                                                                                                                                                                           | 4.737  | 1         |           |            |       |   |  |       |   |            |       |   |
|                                                      |                                                                                                                                                                                                                      | 5.734  | 1         |           |            |       |   |  |       |   |            |       |   |
|                                                      | (flanking)                                                                                                                                                                                                           | 5.734  | 1         |           |            |       |   |  |       |   |            |       |   |
|                                                      | <a href="#">explain score(s)</a> and/or inspect your position(s) in <a href="#">in UCSC Genome Browser</a>                                                                                                           |        |           |           |            |       |   |  |       |   |            |       |   |

B

Mutation Assessor

|   | Mutation          | AA variant | Gene  | MSA                 | PDB                 | Func. Impact | FI score | Uniprot     | Refseq    | MSA height | Codon start position                         | Func. region | Protein bind.site | DNA/RNA bind.site | small.mol bind.site |
|---|-------------------|------------|-------|---------------------|---------------------|--------------|----------|-------------|-----------|------------|----------------------------------------------|--------------|-------------------|-------------------|---------------------|
| 1 | CSF1R_HUMAN W821C | W821C      | CSF1R | <a href="#">msa</a> | <a href="#">pdb</a> | medium       | 2.93     | CSF1R_HUMAN | NP_005202 | 1303       | <a href="#">isoforms</a> hg19:chr5:149435680 |              | 1                 |                   | MES EPE             |
